# Supplementary material
Source: HighWire-hosted journal article supplement (https://cmajopen-stage.highwire.org/highwire/filestream/87924/field_highwire_adjunct_files/3/open-2021-0114-reprise-checklist.pdf)
Supplement: open-2021-0114-reprise-checklist.pdf [file open-2021-0114-reprise-checklist.pdf]

Reporting guideline for health research priority setting (REPRISE). Identifying priorities for sport and physical activity research in Canada

| No       | Item                                                                       | Descriptor and/or examples                                                                                                                                                                            | Location within text        |
|----------|----------------------------------------------------------------------------|-------------------------------------------------------------------------------------------------------------------------------------------------------------------------------------------------------|-----------------------------|
| <b>A</b> | <b>Context and scope</b>                                                   |                                                                                                                                                                                                       |                             |
| 1        | Define geographical scope                                                  | Global, regional, national, city, local area, institutional/organizational level, health service                                                                                                      | Page 5. Step 1.             |
| 2        | Define health area, field, focus                                           | Disease or condition specific, interventions, healthcare delivery, health system                                                                                                                      | Page 3. End of introduction |
| 3        | Define the intended beneficiaries                                          | This may include the general population or a specific population based on demographic (age, gender), clinical (disease, condition), or other characteristics who may benefit from the research        | Page 3.                     |
| 4        | Define the target audience of the priorities                               | Policy makers, funders, researchers, industry or others who have the potential to implement the priorities identified                                                                                 | Page 3.                     |
| 5        | Identify the research area                                                 | Public health, health services research, clinical research, basic science                                                                                                                             | Page 3.                     |
| 6        | Identify the type of research questions                                    | Etiology, diagnosis, prevention, treatment (interventions), prognosis, health services, psychosocial, behavioral and social science, economic evaluation, implementation; this may not be pre-defined | Page 5. Step 1.             |
| 7        | Define the time frame                                                      | Interim, short-term, long-term priorities, plans to revise and update                                                                                                                                 | Page 5.                     |
| <b>B</b> | <b>Governance and team</b>                                                 |                                                                                                                                                                                                       |                             |
| 8        | Describe the selection and structure of the leadership and management team | Those responsible for initiating, developing, and guiding the process for priority setting, and examples of structures include; Steering Committee, Advisory Group, Technical Experts                 | Page 5. Research team.      |

|          |                                                                             |                                                                                                                                                                                                                    |                                 |
|----------|-----------------------------------------------------------------------------|--------------------------------------------------------------------------------------------------------------------------------------------------------------------------------------------------------------------|---------------------------------|
| 9        | Describe the characteristics of the team                                    | Stakeholder group or role, institutional affiliations, country or region, demographics (e.g. age sex), discipline, experience, expertise                                                                           | Page 5. Research team.          |
| 10       | Describe any training or experience relevant to conducting priority setting | Consultants or advisors, members with experience or skills relevant to the conducting priority-setting e.g. qualitative methods, surveys, facilitation                                                             | Page 5. Research team + Step 1. |
| <b>C</b> | <b>Framework for priority setting</b>                                       |                                                                                                                                                                                                                    |                                 |
| 11       | State the framework used (if any)                                           | James Lind Alliance, COHRED, CHNRI, Dialogue Model, no framework (general research priority setting)                                                                                                               | Page 3. Design.                 |
| <b>D</b> | <b>Stakeholders or participants</b>                                         |                                                                                                                                                                                                                    |                                 |
| 12       | Define the inclusion criteria for stakeholders involved in priority-setting | Patients, caregivers, general community, health professionals, researchers, policy makers, non-governmental organizations, government, industry; specific groups including vulnerable and marginalized populations | Page 5. Step 1.                 |
| 13       | State the strategy or method for identifying and engaging stakeholders      | Partnership with organizations, social media, recruitment through hospitals                                                                                                                                        | Page 5. Step 1.                 |
| 14       | Indicate the number of participants and/or organizations involved           | Number of individuals and organizations, include number by stakeholder group                                                                                                                                       | Page 7.                         |
| 15       | Describe the characteristics of stakeholders                                | Stakeholder group, demographic characteristics, areas of interest and expertise, discipline, affiliations                                                                                                          | Table 1.                        |
| 16       | State if reimbursement for participation was provided                       | Cash, vouchers, certificates, acknowledgement; what purpose e.g. travel, accommodation, honorarium                                                                                                                 | N/A                             |

|          |                                                                                           |                                                                                                                                                                                                                                                                                                            |                        |
|----------|-------------------------------------------------------------------------------------------|------------------------------------------------------------------------------------------------------------------------------------------------------------------------------------------------------------------------------------------------------------------------------------------------------------|------------------------|
| <b>E</b> | <b>Identification and collection of research priorities</b>                               |                                                                                                                                                                                                                                                                                                            |                        |
| 17       | Describe methods for collecting initial priorities                                        | Methods e.g. Delphi survey, surveys, nominal group technique, interviews, focus groups, meetings, workshops; prioritization e.g. voting, ranking; mode e.g. face-to-face, online; may be informed by evidence e.g. systematic reviews, reviews of guidelines/other documents, health technology assessment | Page 5 + 6.            |
| 18       | Describe methods for collating and categorizing priorities                                | Taxonomy or other framework used to organize, summarise, and aggregate topics or questions                                                                                                                                                                                                                 | Page 6. Data analysis. |
| 19       | Describe methods and reasons for modifying (removing, adding, reframing) priorities       | Based on scope, clarity, definition, duplication, other criteria                                                                                                                                                                                                                                           | Page 6. Data analysis. |
| 20       | Describe methods for refining or translating priorities into research topics or questions | Reviewed by Steering Committee or project team                                                                                                                                                                                                                                                             | Page 6. Step 3.        |
| 21       | Describe methods for checking whether research questions or topics have been answered     | Systematic reviews, evidence mapping, consultation with experts                                                                                                                                                                                                                                            | N/A                    |
| 22       | Describe number of research questions or topics                                           | Number of priorities at each stage of the process                                                                                                                                                                                                                                                          | Page 7.                |
| <b>F</b> | <b>Prioritization of research topics/questions</b>                                        |                                                                                                                                                                                                                                                                                                            |                        |
| 23       | Describe methods and criteria for prioritizing research topics or questions               | Methods e.g. Delphi survey, surveys, nominal group technique, interviews, focus groups, meetings, workshops; Prioritization e.g. voting, ranking;                                                                                                                                                          | Page 5 + 6.            |

|          |                                                                                                                                         |                                                                                     |                           |
|----------|-----------------------------------------------------------------------------------------------------------------------------------------|-------------------------------------------------------------------------------------|---------------------------|
|          |                                                                                                                                         | Mode e.g. face-to-face, online;<br>Criteria e.g. need, feasibility, novelty, equity |                           |
| 24       | State the method or threshold for excluding research topics/questions                                                                   | Thresholds for ranking scores, proportions, votes; other criteria                   | Page 7. Data analysis.    |
| <b>G</b> | <b>Output</b>                                                                                                                           |                                                                                     |                           |
| 25       | State the approach to formulating the research priorities                                                                               | Area, topic, questions, PICO (population, intervention, comparator, outcome)        | Page 6. Step 3.           |
| <b>H</b> | <b>Evaluation and feedback</b>                                                                                                          |                                                                                     |                           |
| 26       | Describe how the process of prioritization was evaluated                                                                                | Survey, workshop                                                                    | N/A                       |
| 27       | Describe how priorities were fed back to stakeholders and/or to the public; and how feedback (if received) was addressed and integrated | Public meetings or workshop, newsletters, website, email, online presentations      | Page 6.                   |
| <b>I</b> | <b>Implementation</b>                                                                                                                   |                                                                                     |                           |
| 28       | Outline the strategy or action plans for implementing priorities                                                                        | Communication with target audience, via policies and funding                        | To be described elsewhere |
| 29       | Describe plans, strategies, or suggestions to evaluate impact                                                                           | Integration in decision-making, funding allocation, review of relevant documents    | To be described elsewhere |

|          |                                              |                                                                                                                                                                                               |                                                       |
|----------|----------------------------------------------|-----------------------------------------------------------------------------------------------------------------------------------------------------------------------------------------------|-------------------------------------------------------|
| <b>J</b> | <b>Funding and conflict of interest</b>      |                                                                                                                                                                                               |                                                       |
| 30       | State sources of funding                     | Name sources of funding for the priority-setting exercise; if relevant include the budget and/or cost                                                                                         | Page 1.                                               |
| 31       | Declare any conflicts or competing interests | State any conflicts of interest that may be at an individual level and/or at a contextual level (e.g. political issues, controversies) that may affect the process, output or implementation. | No conflicts of interest as per COI disclosure forms. |
